# Supplementary material for: Synthesis and Surface Strengthening Modification of Silica Aerogel from Fly Ash
Source: MDPI journal article supplement (doi:10.3390/ma17071614), 2024-04-01
Supplement: s1 [file s1]

## Supplementary Materials:

### 1.1 Reagents

The main reagents used in the experiment are shown in Table S1.

**Table S1.** Experimental reagents.

| Reagents                                                        | Specifications | Suppliers                                                     |
|-----------------------------------------------------------------|----------------|---------------------------------------------------------------|
| Na <sub>2</sub> CO <sub>3</sub>                                 | AR             | Aladdin Reagent Shanghai Co., Ltd                             |
| HCl                                                             | AR             | China National Pharmaceutical Group Chemical Reagent Co., Ltd |
| C <sub>9</sub> H <sub>12</sub>                                  | AR             |                                                               |
| NaOH                                                            | AR             |                                                               |
| NH <sub>3</sub> ·H <sub>2</sub> O                               | AR             | Aladdin Reagent Shanghai Co., Ltd                             |
| CH <sub>3</sub> CH <sub>2</sub> OH                              | AR             | Aladdin Reagent Shanghai Co., Ltd                             |
| CH <sub>3</sub> Si (CH <sub>3</sub> O) <sub>3</sub>             | 98%            | Aladdin Reagent Shanghai Co., Ltd                             |
| CH <sub>3</sub> (CH <sub>2</sub> ) <sub>3</sub> CH <sub>3</sub> | AR             | Aladdin Reagent Shanghai Co., Ltd                             |
| ((CH <sub>3</sub> ) <sub>3</sub> Si) <sub>2</sub> O             | 98%            | Aladdin Reagent Shanghai Co., Ltd                             |
| C <sub>6</sub> H <sub>16</sub> O <sub>3</sub> Si                | >98%           | Aladdin Reagent Shanghai Co., Ltd                             |

### 1.2 Equipment

The model numbers of the equipment used for testing are shown in Table S2.

**Table S2.** Main experimental equipment.

| Equipment                      | Model    | Manufacturer                                   |
|--------------------------------|----------|------------------------------------------------|
| X-ray diffraction spectrometer | XD-3X    | Beijing Puxi General Instrument Co., Ltd       |
| Physical adsorption analyzer   | ASAP2020 | Mike Company in the United States              |
| FT-IR                          | VERTEX70 | Bruker, Germany                                |
| Thermal conductivity meter     | TC-3000E | Xi'an Xiayi Electronic Technology Co., Ltd     |
| Contact angle tester           | CA100B   | Shanghai Yingnuo Precision Instrument Co., Ltd |

**Table S3.** Orthogonal test results analysis table.

| Item                            | Level | A      | B      | C      | D      |
|---------------------------------|-------|--------|--------|--------|--------|
| K                               | 1     | 117.68 | 103.27 | 114.94 | 108.06 |
|                                 | 2     | 118.25 | 118.35 | 110.08 | 116.44 |
|                                 | 3     | 103.05 | 117.36 | 113.96 | 114.48 |
| k                               | 1     | 39.23  | 34.42  | 38.31  | 36.02  |
|                                 | 2     | 39.42  | 39.45  | 36.69  | 38.81  |
|                                 | 3     | 34.35  | 39.12  | 37.99  | 38.16  |
| Optimal Level                   |       | 2      | 2      | 1      | 2      |
| Range                           |       | 5.07   | 5.03   | 1.62   | 2.79   |
| Number of levels                |       | 3      | 3      | 3      | 3      |
| Number of repetitions per level |       | 3      | 3      | 3      | 3      |

Note: K represents the sum of the desilication rates under the same level and condition in the experiment. Meanwhile, k represents the average of the summed desilication rates. Range indicates the range of the factors in the experiment, calculated as follows for the same factor

$$(k_1-k_3): R = k_{\max} - k_{\min}.$$
